# Supplementary material
Source: PubMed Central journal article supplement (PMC1395393)
Supplement: jvirol_80_5_2162__1.pdf [file jvirol_80_5_2162__1.pdf]

## Supplement: Fig. S1. Sequence of the matched peptides from MALDI-TOF analysis

### Ssa1p

1 MSKAVGIDLG TTYSCVAHFA NDRVDIAND QGNR**TTPSFV AFTDTERLIG**  
51 DAAK**NQAAMN PSNTVFD**AKR LIGR**NFN**DPE **VQADM**KHFPF KLIDVDGK**PQ**  
101 IQVEFKGETK **NFTPEQISSM VLGK**MKETAE SYLGAK**VNDA VVTVPAYFND**  
151 **SQRQATKDAG TIAGLNV**LRI INEPTAAAI A YGLDKKGKEE HVLIFDLGGG  
201 TFDVSLLEIE DGIFEV**KATA GDTHLGGEDF DNRLVNHFIQ EFKR**RKNKKDL  
251 **STNQR**ALRRL **RTACER**AKRT LSSSAQTSVE IDSLFEGIDF YTSITR**ARFE**  
301 **ELCADLFR**ST LDPVEK**VLRD AKL**DKSQ**VE IVLVGG**STRI PKVQK**LVTDY**  
351 **FNGKEPNRSI** NPDEAVAYGA AVQAAILTGD ESSKTQD**LL**L LDVAPLSLGI  
401 ETAGGVMTKL IPRNSTISTK KFEIFSTYAD NQPGVLIQVF EGERAK**TKDN**  
451 **NLLGKFELSG IPPAPR**GVQP IEVTFD**V**DSN GILN**V**SAVEK GTGKSNK**IT**I  
501 TNDKGRLSKE DIEKM**V**AEAE KFKEEDEKES QRIASK**N**QLE SIAYSLK**N**TI  
551 SEAGDKLEQA DKD**V**TKKAE ETISW**L**DSNT TASKEEFDDK LKELQDIANP  
601 IMSKLYQAGG APGGAAGGAP GGFPGGAPPA PEAEGPTVEE VD\*

### Tdh2p

1 **MVRVAINGFG RIGRLVM**RIA LQRKNVEVVA LNDPFISNDY SAYMFKYDST  
51 HGRYAGEVSH DDKHII**VDG**K **KIATFQ**ERDP ANLPWASLNI DIAIDSTGVF  
101 KELD**T**AQKHI DAGAKKVVIT APSS**T**APMFV MGVNEEKYTS DLK**IV**SNASC  
151 **TTNCLAPLAK** VINDAFGIEE GLMTTVH**S**MT ATQK**TV**DG**PS HKDWR**GGRTA  
201 SGNIPSS**T**G AAKAVGK**VLP ELQ**GK**LTGMA FRV**PTVDVSV VDLTVKLNKE  
251 TTYDEIKK**VV KAA**AE**GK**LKG VLG**Y**TEDAVV S**S**DFLGDSNS SIFDAAAGIQ  
301 LSPKFV**KLV**S **WYDNEYGYST RV**VDLVEHVA KA

### Pdc1p

1 MSEITLGK**YL FER**LKQVNVN TVFGLPGDFN LSLLD**KIYEV EGM**RWAGNAN  
51 **ELNAAYAADG YARI**KGMSCI ITTFGVGELS ALNGIAGSYA EHVGV**LHV**VG  
101 VPSISAQAKQ LLLHHTL**G**NG DFTV**FHR**MSA NIS**ET**TAMIT DIATA**PAE**ID  
151 RCIR**TY**VTQ R**PV**Y**LGL**PAN LV**DL**N**VPA**KL LQ**TP**IDMSL**K** P**ND**AESEKEV  
201 ID**T**ILAL**VKD AKNP**VILADA **CCSR**H**DV**KAE TKKLIDLTQF PAFV**TP**MG**KG**  
251 **SIDEQHPRYG GVVY**G**TL**SKP **EV**KEAVESAD LILSVGALLS DFNTGSFSYS  
301 YK**T**K**NIVE**FEH **SDHM**KIRNAT **FPGVQ**M**K**FVL QKLL**T**TIADA AK**GYK**PV**AVP**  
351 **AR**TPANA**AVP** AST**PL**KQEW**M** WN**Q**LGN**FL**QE GD**V**VIA**ET**GT SAFGIN**Q**TF  
401 P**N**NTY**G**ISQV LWGSIG**FT**TG AT**L**GAA**F**AAE EID**P**K**R**VIL FIGD**G**SLQ**L**T  
451 VQE**I**STMIRW GLK**P**YLFV**L**N ND**G**Y**T**IEK**L**I H**G**PKAQY**NEI** Q**G**WD**H**LS**L**LP  
501 TFGAK**DYETH RV**ATTGE**W**DK LTQDK**S**FNDN SKIR**M**IE**I**ML PVFDAP**Q**NLV  
551 EQAK**L**TAATN AKQ\*

### Ssa2p

1 MSK**AV**GIDLG TTYSCVA**HFS** NDRVDIAND QGNR**TTPSFV GFTD**TERLIG  
51 DAAK**NQAAMN PANTV**FD**AKR** LIGR**NFN**DPE **VQGM**KHFPF KLIDVDGK**PQ**  
101 IQVEFKGETK **NFTPEQISSM VLGK**MKETAE SYLGAK**VNDA VVTVPAYFND**  
151 **SQRQATKDAG TIAGLNV**LRI INEPTAAAI A YGLDKKGKEE HVLIFDLGGG  
201 TFDVSL**S**IE DGIFEV**KATA GDTHLGGEDF DNRLVNHFIQ EFKR**RKNKKDL  
251 **STNQR**ALRRL **RTACER**AKRT LSSSAQTSVE IDSLFEGIDF YTSITR**ARFE**  
301 **ELCADLFR**ST LDPVEK**VLRD AKL**DKSQ**VE IVLVGG**STRI PKVQK**LVTDY**  
351 **FNGKEPNRSI** NPDEAVAYGA AVQAAILTGD ESSKTQD**LL**L LDVAPLSLGI  
401 ETAGGVMTKL IPRNSTIPTK KSEVFSTYAD NQPGVLIQVF EGERAK**TKDN**  
451 **NLLGKFELSG IPPAPR**GVQP IEVTFD**V**DSN GILN**V**SAVEK GTGKSNK**IT**I  
501 TNDKGRLSKE **DIEKM**V**AEAE** KFKEEDEKES QRIASK**N**QLE SIAYSLK**N**TI  
551 SEAGDKLEQA DKDA**V**TKKAE ETIAW**L**DSNT TATKEEFDDQ LKELQEVANP  
601 IMSKLYQAGG APEGAAPGGF PGGAPP**PEA** EGPTVEEVD

### Tdh3p

1 **MVRVAINGFG RIGRLVM**RIA LSRPNVEVVA LNDPFITNDY AAYMFKYDST  
51 HGRYAGEVSH DDKHII**VDG**K **KIATYQ**ERDP ANLPWGSSNV DIAIDSTGVF  
101 KELD**T**AQKHI DAGAKKVVIT APSS**T**APMFV MGVNEEKYTS DLK**IV**SNASC  
151 **TTNCLAPLAK** VINDAFGIEE GLMTTVH**S**LT ATQK**TV**DG**PS HKDWR**GGRTA  
201 SGNIPSS**T**G AAKAVGK**VLP ELQ**GK**LTGMA FRV**PTVDVSV VDLTVKLNKE  
251 TTYDEIKK**VV KAA**AE**GK**LKG VLG**Y**TEDAVV S**S**DFLGDSHS SIFDASAGIQ  
301 LSPKFV**KLV**S **WYDNEYGYST RV**VDLVEHVA KA\*

---

The sequences of the matched peptides from MALDI-TOF analysis are shown in red, whereas the full-length sequences of yeast proteins are shown in black.
